# Supplementary material
Source: PubMed Central journal article supplement (PMC6325043)
Supplement: 12687_2018_374_MOESM1_ESM.pdf [file 12687_2018_374_MOESM1_ESM.pdf]

**ENQUETE SUR LA GENETIQUE DU RETARD HANDICAP MENTAL DANS QUELQUES  
INSTITUTIONS DE KINSHASA (REPUBLIQUE DEMOCRATIQUE DU CONGO)**

|             |           |  |  |
|-------------|-----------|--|--|
| INSTITUTION | DATE      |  |  |
|             | CODE      |  |  |
|             | ENQUETEUR |  |  |

|          |  |
|----------|--|
| IDENTITE |  |
|----------|--|

|                                                |                 |
|------------------------------------------------|-----------------|
| PRENOM :                                       | DN du père :    |
| NOMS :                                         | DN de la mère : |
| ADRESSE :                                      | Tél :           |
| DATE DE NAISSANCE :                      AGE : | Email :         |

|              |  |
|--------------|--|
| MENSURATIONS |  |
|--------------|--|

| MENSURATIONS      |       |        |
|-------------------|-------|--------|
| PERIMETRE CRANIEN | POIDS | TAILLE |
|                   |       |        |

ARBRE GENEALOGIQUE

| N° | ITEMS                                                      |                                                                                                      | Score |     | Total        |
|----|------------------------------------------------------------|------------------------------------------------------------------------------------------------------|-------|-----|--------------|
|    | Grossesse et accouchement                                  |                                                                                                      | Oui   | Non | Commentaires |
| 1  | Infections pendant la grossesse                            | Fièvre, pertes anormales ou traitement pour infections génitale.                                     |       |     |              |
| 2  | Traitement de l'infection ?                                | Prise de médicaments, les quels ?                                                                    |       |     |              |
| 3  | Menace d'avortement au premier trimestre                   | Douleurs au bas ventre, écoulements génitaux claires ou teintés de sang                              |       |     |              |
| 4  | Traitement de la menace ?                                  | Médicaments, autres que des antibiotiques, pris pour calmer les douleurs et arrêter les écoulements  |       |     |              |
| 5  | Complications durant la grossesse et/ ou de l'accouchement | La mère a eu des infections, diabète ou hypertension.                                                |       |     |              |
| 6  | Age de la grossesse à l'accouchement                       | Avant, pendant ou après le terme probable ?                                                          |       |     |              |
| 7  | Accouchement par césarienne, si oui pour quel indication ? | Pour quelle raison le médecin a-t 'il décidé de pratiquer la césarienne ?                            |       |     |              |
| 8  | Détresse respiratoire à la naissance                       | Le bébé avait-il pris au moins 5 minutes avant de pleurer, ou a-t 'il été traité avec de l'oxygène ? |       |     |              |

|    |                                                                                                                               |                                                                                                                                                                                  |            |                     |  |
|----|-------------------------------------------------------------------------------------------------------------------------------|----------------------------------------------------------------------------------------------------------------------------------------------------------------------------------|------------|---------------------|--|
| 9  | Coma durant la période néonatale                                                                                              | Le bébé est-il resté plus de 6 heures sans se réveiller                                                                                                                          |            |                     |  |
| 10 | Infection néonatale ?                                                                                                         | Le bébé a-t 'il reçu des antibiotiques à la maternité ou dans la couveuse ?                                                                                                      |            |                     |  |
| 11 | Y'avait-il incompatibilité rhésus ?                                                                                           | La mère était-elle Rhésus Négatif alors que le bébé était positif ?                                                                                                              |            |                     |  |
| 12 | Ictère néonatal                                                                                                               | Dans la première semaine a-t 'il été traité pour la jaunisse ?                                                                                                                   |            |                     |  |
| 13 | <b>Repères du développement psychomoteur</b>                                                                                  | <b>Explications</b>                                                                                                                                                              | <b>Age</b> | <b>Commentaires</b> |  |
| 14 | Vers quel âge votre enfant pouvait-il tenir droite ou redresser sa tête ?                                                     | à 3 mois : tenir la tête droite quand il est couché sur le dos ou redresser la tête et le tronc quelques secondes en s'appuyant sur ses bras lorsqu'il est allongé sur le ventre |            |                     |  |
| 15 | Vers quel âge pouvait-il se retourner, passer du dos vers le ventre et vice versa ?                                           | à 6 mois : peut passer du dos à plat ventre et vice versa ou peut s'asseoir seul pendant 5-10 secondes en s'appuyant sur ses bras étendus en avant en soutien                    |            |                     |  |
| 16 | Vers quel âge pouvait-il se tenir debout, même en se servant d'objets ?                                                       | à 1 an: peut se mettre debout à l'aide d'appuis, rester debout seul 3-5 secondes tenir debout avec appui ou marcher avec appui 3-4 pats                                          |            |                     |  |
| 17 | Vers quel âge pouvait-il courir ?                                                                                             | à 2 ans : peut courir sans tomber ou sauter sur un pied                                                                                                                          |            |                     |  |
| 18 | Quand a-t 'il commencé à dire « papa », « maman »                                                                             | avant son 1 <sup>er</sup> anniversaire Mots simples « papa, Mama »                                                                                                               |            |                     |  |
| 19 | Quand a-t 'il dit « donne-moi » « viens ici », ou « laisse-moi »                                                              | avant le 2 <sup>ème</sup> anniversaire: peut construire des phrases à au moins 2 mots                                                                                            |            |                     |  |
| 20 | Sujet + verbe + complément : laisse-moi, je ne veux pas, tu es méchant.                                                       | avant le 3 <sup>ème</sup> anniversaire : peut tenir une conversation à 2 ou 3 phrases simples                                                                                    |            |                     |  |
| 21 | Quand a-t 'il commencé à vous rapporter ce qui s'est passé en votre absence ?                                                 | avant le 4 <sup>ème</sup> anniversaire: phrases à >4 mots, raconter sa journée avant 4 ans                                                                                       |            |                     |  |
| 22 | A partir de quel âge a-t'il commencé à sucer les objets ?                                                                     | à 3 mois : ramène ses doigts ou tout objet à sa bouche ou émet des vocalises en réponse à la voix ou au sourire de l'adulte                                                      |            |                     |  |
| 23 | A partir de quel âge a-t'il commencé à essayer de boire dans un gobelet?                                                      | à 6 mois : peut tenir des petits objets entre l'index et le majeur ou peut porter un gobelet à sa bouche dans l'intention de boire                                               |            |                     |  |
| 24 | A partir de quel âge a-t'il commencé à faire bye-bye?                                                                         | à 1 an: peut applaudir avec les deux mains ensemble ou faire bye-bye avec sa main (waiving)                                                                                      |            |                     |  |
| 25 | A partir de quel âge pouvait-il laver ses mains ou très bien engager une interaction avec un enfant autre que de la fratrie ? | à 2 ans : peut laver ses mains ou très bien engager une interaction avec un enfant autre que de la fratrie                                                                       |            |                     |  |
| 26 | A quel âge pouvait-il jouer avec des poupées, des jouets                                                                      | Age auquel il a commencé à s'intéresser aux jouets.                                                                                                                              |            |                     |  |
| 27 | A quel âge pouvait-il avoir des amis et jouer avec                                                                            | A partir de quand était-il capable de Jouer avec ses autres frères et sœurs ou avec d'autres enfants                                                                             |            |                     |  |

|    |                                                                     |                                                                                                                                                                                            |          |          |          |          |          |          |
|----|---------------------------------------------------------------------|--------------------------------------------------------------------------------------------------------------------------------------------------------------------------------------------|----------|----------|----------|----------|----------|----------|
| 28 | <b>Questions dérivées des checklists du syndrome de l'X fragile</b> |                                                                                                                                                                                            |          |          |          |          |          |          |
| 29 | <b>Antécédents médicaux</b>                                         | <b>Explications</b>                                                                                                                                                                        | <b>0</b> | <b>1</b> | <b>2</b> | <b>a</b> | <b>b</b> | <b>c</b> |
| 30 | Le retard mental                                                    | Est-il suivi pour retard mental                                                                                                                                                            |          |          |          |          |          |          |
| 31 | Depuis quel âge                                                     | A partir de quel âge aviez-vous conclu qu'il avait un problème                                                                                                                             |          |          |          |          |          |          |
| 32 | Notion d'épilepsie chez le patient                                  | Le patient a déjà présenté des convulsions ou est connu épileptique                                                                                                                        |          |          |          |          |          |          |
| 33 | Antécédent de chirurgie                                             | Il a déjà bénéficié d'une opération chirurgicale. Indication ?                                                                                                                             |          |          |          |          |          |          |
| 34 | Antécédent de Malformation congénitales dans la fratrie             | Au moins un membre de la fratrie est né avec une malformation. Laquelle ?                                                                                                                  |          |          |          |          |          |          |
| 35 | L'histoire familiale de retard mental                               | Au moins un frère et/ou un cousin jusqu'au troisième degré du côté maternel a/avait aussi le retard mental                                                                                 |          |          |          |          |          |          |
|    | <b>comportement</b>                                                 | <b>Assertion</b>                                                                                                                                                                           | <b>0</b> | <b>1</b> | <b>2</b> | <b>a</b> | <b>b</b> | <b>c</b> |
| 36 | Déficit d'attention                                                 | Est facilement distrait, a du mal à se concentrer sur une tâche.                                                                                                                           |          |          |          |          |          |          |
| 37 | L'hyperactivité                                                     | Toujours en mouvement (l'incapacité de rester assis au même endroit)                                                                                                                       |          |          |          |          |          |          |
| 38 | L'hyper-sensibilité aux stimuli environnementaux                    | Supporte-il le bruit et les grandes foules comme à l'église ou les fêtes                                                                                                                   |          |          |          |          |          |          |
| 39 | L'impulsivité                                                       | Agit rapidement sans penser aux conséquences de ses actes, réponds aux questions avant même d'y avoir réfléchi ou d'y être invité                                                          |          |          |          |          |          |          |
| 40 | Est volage                                                          | Passe d'un travail à un autre dans un temps court ou avant la fin de la première.                                                                                                          |          |          |          |          |          |          |
| 41 | La timidité                                                         | Est inhibé dans ses approches                                                                                                                                                              |          |          |          |          |          |          |
| 42 | La serviabilité (est serviable)                                     | Est prompt à aider surtout pour les tâches ménagères.                                                                                                                                      |          |          |          |          |          |          |
| 43 | Conflit entre le besoin de contact et le refus de contact           | Requiert votre attention, mais ne sait pas reconnaître quand vous la lui donnez, requière un contact mais ne le tolère pas.                                                                |          |          |          |          |          |          |
| 44 | Craintif                                                            | Il a souvent peur des inconnus, du noir ou des insectes.                                                                                                                                   |          |          |          |          |          |          |
| 45 | Gaieté                                                              | Est amical, généralement de bonne humeur, donne souvent l'impression d'être heureux.                                                                                                       |          |          |          |          |          |          |
| 46 | Résistance au changement                                            | A du mal à faire face aux changements de son style de vie quotidienne ou de l'environnement (réaction anxieuse, agressive, euphorique ou agité quand on lui change de jouet ou de chaise). |          |          |          |          |          |          |
| 47 | Les morsures des mains                                              | Se mord les mains ou les doigts.                                                                                                                                                           |          |          |          |          |          |          |
| 48 | Stéréotypie des mains                                               | Exécute des mouvements répétitifs des mains (se frotte constamment les mains, celles-ci sont souvent jointes, jongle avec des objets).                                                     |          |          |          |          |          |          |
| 49 | L'agitation des mains                                               | Fait des mouvements rapides et vigoureux des mains et / ou des bras de haut en bas.                                                                                                        |          |          |          |          |          |          |

|              |                                                 |                                                                                                                                            |          |          |          |          |          |          |
|--------------|-------------------------------------------------|--------------------------------------------------------------------------------------------------------------------------------------------|----------|----------|----------|----------|----------|----------|
| 50           | Le regard fuyant                                | Il évite de regarder son interlocuteur dans les yeux.                                                                                      |          |          |          |          |          |          |
| 51           | Détourne son visage de son interlocuteur        | Le visage et les épaules sont souvent détournés pour éviter un contact direct avec son interlocuteur.                                      |          |          |          |          |          |          |
| 52           | L'aversion du contact tactile                   | Au cours de l'examen clinique le patient a opposé un refus de se laisser toucher le thorax, les oreilles et les organes génitaux externes. |          |          |          |          |          |          |
|              | <b>Les anomalies du langage</b>                 | <b>Assertions</b>                                                                                                                          | <b>0</b> | <b>1</b> | <b>2</b> | <b>a</b> | <b>b</b> | <b>c</b> |
| 53           | Débit verbal rapide                             | Parle rapidement                                                                                                                           |          |          |          |          |          |          |
| 54           | Tendance à parler tout le temps                 | Donne l'impression d'avoir beaucoup à dire.                                                                                                |          |          |          |          |          |          |
| 55           | Langage persévératif                            | Revient sans cesse sur le même sujet de conversation                                                                                       |          |          |          |          |          |          |
| 56           | Echolalie                                       | Tendance à répéter les mots de l'interlocuteur                                                                                             |          |          |          |          |          |          |
| 57           | Langage limité                                  | Répétition des mêmes mots                                                                                                                  |          |          |          |          |          |          |
|              | <b>Caractéristiques physiques</b>               | <b>Bref descriptif</b>                                                                                                                     | <b>0</b> | <b>1</b> | <b>2</b> | <b>a</b> | <b>b</b> | <b>c</b> |
| 58           | La macrocéphalie                                | Le PC est >P <sub>97</sub> pour l'âge et le sexe.                                                                                          |          |          |          |          |          |          |
| 59           | Le visage allongé et rétréci à mi-parcours      | Son visage est plus allongé que les autres personnes de même sexe et même âge.                                                             |          |          |          |          |          |          |
| 60           | Le front large                                  | Son front est plus large que les autres personnes de même sexe et même âge.                                                                |          |          |          |          |          |          |
| 61           | Mandibule proéminente                           | Sa mandibule est plus développée que la partie moyenne du visage.                                                                          |          |          |          |          |          |          |
| 62           | Les oreilles larges et décollées                | Longueur de l'oreille > P <sub>97</sub> .                                                                                                  |          |          |          |          |          |          |
| 63           | La macro-orchidie                               | Le volume d'un testicule est supérieur à 25 ml (pour les adultes).                                                                         |          |          |          |          |          |          |
| 64           | L'hyper-extensibilité métacarpo-phalangienne    | Les articulations métacarpo-phalangiennes de 3 <sup>ème</sup> et 4 <sup>ème</sup> doigt peuvent exécuter une extension ≥90°.               |          |          |          |          |          |          |
| 65           | L'hyper-extensibilité des grosses articulations | Le coude et le genou peuvent s'étendre au-delà 180°.                                                                                       |          |          |          |          |          |          |
| 66           | Pli palmaire unique                             | A un seul pli sur la paume de main                                                                                                         |          |          |          |          |          |          |
| 67           | L'iris bleu pâle                                | L'iris a la couleur bleu                                                                                                                   |          |          |          |          |          |          |
| <b>TOTAL</b> |                                                 |                                                                                                                                            |          |          |          |          |          |          |

Autres signes de dysmorphie:

1. ....
2. ....
3. ....
4. ....
5. ....
6. ....
7. ....
8. ....
9. ....

10. ....

Fait à Kinshasa, le .....

Nom et signature de l'enquêteur:.....
